# Supplementary material for: Carbon dioxide adsorption to UiO-66: theoretical analysis of binding energy and NMR properties
Source: Royal Society of Chemistry journal article supplement (doi:10.1039/d3cp04033j), 2023-01-01
Supplement: d3cp04033j1.pdf [file d3cp04033j1.pdf]

## Supporting Information

### **Carbon dioxide adsorption to UiO-66: theoretical analysis of binding energy and NMR properties**

Michiko Atsumi,<sup>†</sup> Jia-Jia Zheng,<sup>‡</sup> Erik Tellgren,<sup>†</sup> Shigeyoshi Sakaki,<sup>\*,§</sup> and  
Trygve Helgaker<sup>\*,†</sup>

<sup>†</sup>*Hylleraas Centre for Quantum Molecular Sciences, Department of  
Chemistry, University of Oslo, Box 1033, N-0315, Norway*

<sup>‡</sup>*Laboratory of Theoretical and Computational Nanoscience, CAS Center  
for Excellence in Nanoscience, National Center for Nanoscience and  
Technology, Chinese Academy of Sciences, No.11 Zhong Guan Cun Bei Yi  
Tiao, Beijing 100190, China*

<sup>§</sup>*Institute for Integrated Cell-Material Sciences, Kyoto University,  
Rhom Plaza R312, Kyoto University, Kyoto-daigaku-Katsura, Nishikyo-  
ku, Kyoto 615-8146. Japan*

| <b>CONTENTS</b>                                                                                                                         | <b>page</b> |
|-----------------------------------------------------------------------------------------------------------------------------------------|-------------|
| 1. Adsorption of sixteen CO <sub>2</sub> molecules in one unit cell (Figure S1)                                                         | S3          |
| 2. Adsorption structure of CO <sub>2</sub> at Site III (Figure S2)                                                                      | S4          |
| 3. Adsorption structure of acetone (Figure S3)                                                                                          | S5          |
| 4. Adsorption structure of methanol (Figure S4)                                                                                         | S6          |
| 5. Comparison of interaction energy (in kcal/mol) between gas molecule and ligand moiety among several computational methods (Table S1) | S7          |
| 6. Interaction energies (in kcal/mol) between gas molecule (CO <sub>2</sub> , acetone, and methanol) and ligand moieties (Table S2)     | S8          |
| 7. Computational results of NMR shielding constants and skews (Tables S3 and S4)                                                        | S9          |
| 8. Reference                                                                                                                            | S10         |

## 1. Adsorption of sixteen CO<sub>2</sub> molecules

(A) The 16<sup>th</sup> CO<sub>2</sub> at Site I

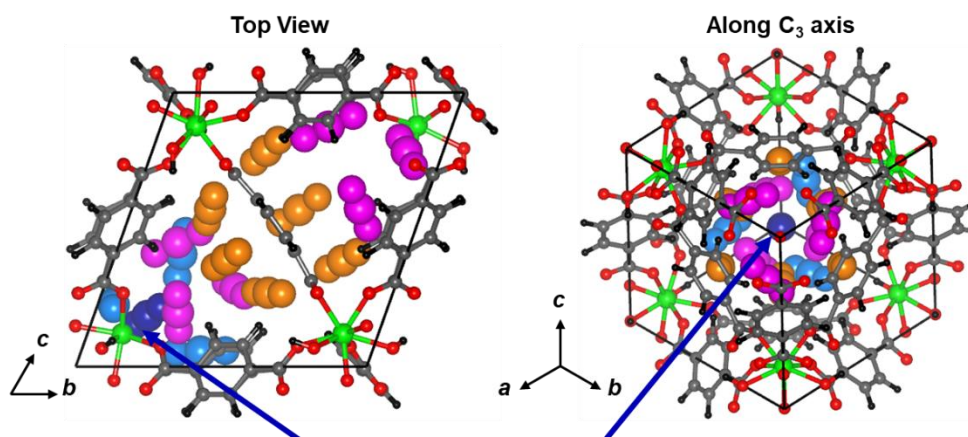

Dark blue; the 16<sup>th</sup> CO<sub>2</sub> molecule adsorbed at the fourth Site I

(B) The 16<sup>th</sup> CO<sub>2</sub> at a new site close to Site III

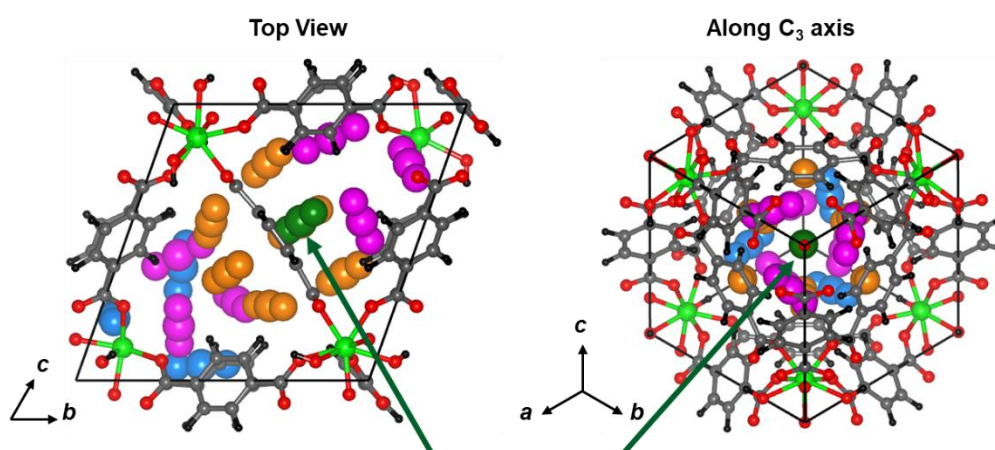

Dark green; the 16<sup>th</sup> CO<sub>2</sub> molecule adsorbed at a new site close to Site III

In the figure at the left-hand side, the sixteenth CO<sub>2</sub> molecule exists at a different position from Sites II and III, but it almost overlaps with the sixteenth CO<sub>2</sub> molecule at Site I in the figure at the right-hand side; in other words, the sixteenth CO<sub>2</sub> at the new site is above the sixteenth CO<sub>2</sub> at Site I (the fourth HO-Zr site; Figure S1(A)).

**Figure S1.** Adsorption structure of sixteen CO<sub>2</sub> molecules optimized by the DFT calculation with PBE-D3 under periodic boundary condition. The sixteenth CO<sub>2</sub> molecule is shown by different color (dark blue in (A) and green color in Figure (B)) in the presence of fifteen CO<sub>2</sub> molecules.

## 2. Adsorption structure of CO<sub>2</sub> at Site III

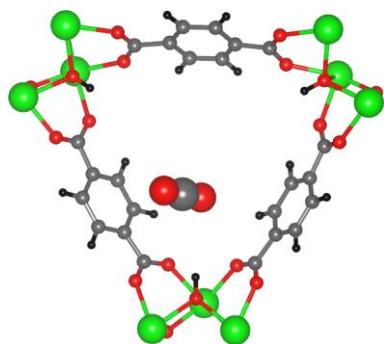

**Figure S2.** CO<sub>2</sub> adsorption structure at Site III shown from different direction. This structure resembles well the Wt site reported previously.<sup>S1</sup>

### 3. Adsorption Structures of Acetone

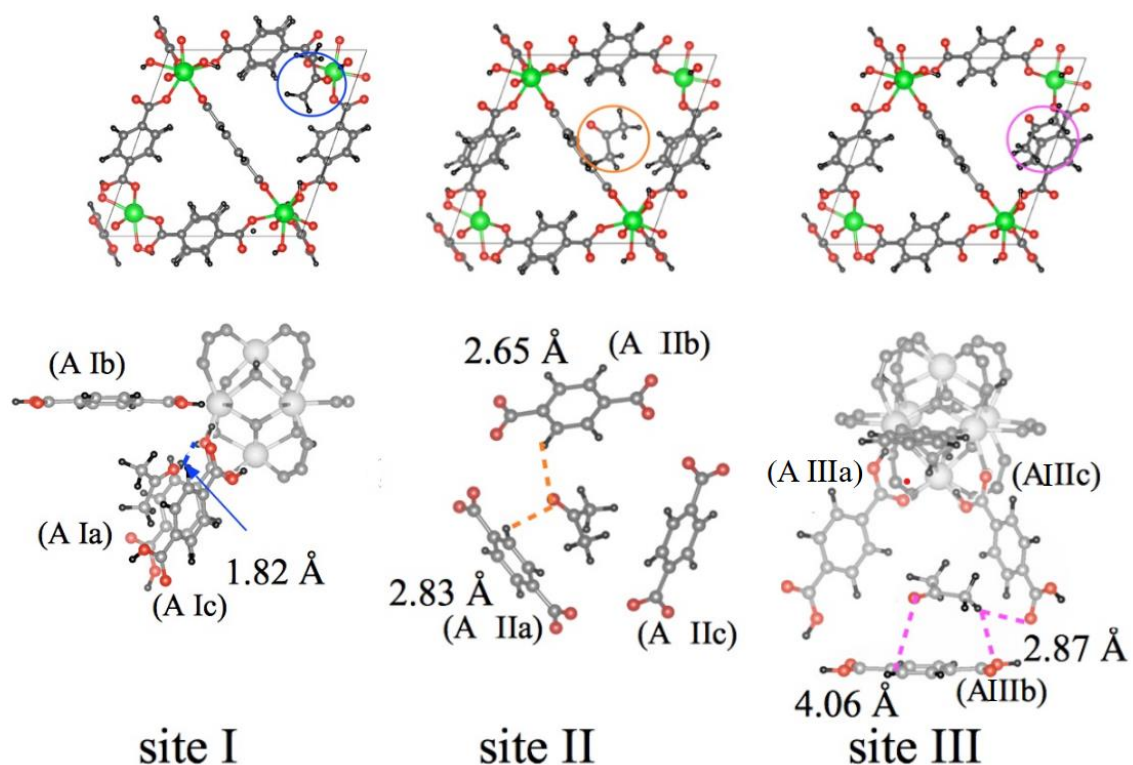

**Figure S3.** Acetone adsorption structures at Site I, II, and III.

Upper: Optimized geometry of one unit cell of UiO-66 with one adsorbed acetone molecule.

Lower: Three adsorption sites.

Small cluster models used for post-Hartree-Fock correction are represented by A Ia, A Ib, A Ic etc. where A means acetone.

#### 4. Adsorption Structures of Methanol

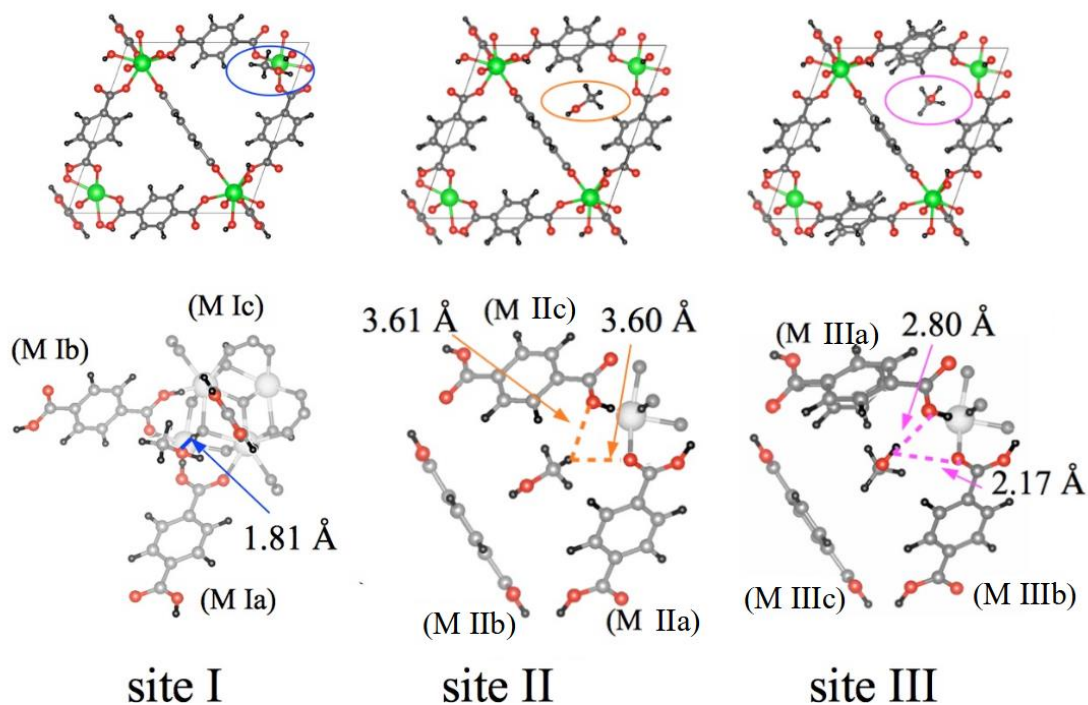

**Figure S4.** Methanol adsorption structures at Sites I, II, and III.

Upper: Optimized geometry of one unit cell in UiO-66 with one adsorbed methanol molecule.

Lower: Three adsorption sites.

Small cluster models used for post-Hartree-Fock correction are represented by M Ia, M Ib, M Ic etc. where M means methanol.

## 5. Comparison of interaction energy (in kcal/mol) of gas molecule with ligand moiety among several computational methods

**Table S1.** Comparison of interaction energy (in kcal/mol) between gas molecule and ligand moiety among CCSD(T), SCS-MP2, and MP2.5.<sup>a</sup>

|                            | CCSD(T) | SCS-MP2 | MP2.5 |
|----------------------------|---------|---------|-------|
| CO <sub>2</sub> Adsorption |         |         |       |
| Site I_M <sup>a</sup>      | -4.68   | -3.88   | -4.40 |
| Site II                    | -2.61   | -1.89   | -2.37 |
| Site III                   | -2.72   | -1.95   | -2.46 |
| Acetone Adsorption         |         |         |       |
| Site I_M <sup>a</sup>      | -9.36   | -7.63   | -9.08 |
| Site II                    | -7.26   | -6.09   | -7.18 |
| Site III                   | -7.48   | -5.89   | -7.32 |
| Methanol Adsorption        |         |         |       |
| Site I_M <sup>a</sup>      | -5.93   | -4.3    | -5.54 |
| Site II                    | -6.62   | -5.11   | -6.45 |
| Site III                   | -5.47   | -4.51   | -5.42 |

<sup>a</sup> Sites II and III are shown in Figure 2. Site I\_M represents that the Zr-OH moiety is removed from Site I (Figure 2). We employed Site I\_M here because CCSD(T) calculations could not be carried out due to the large size of Site I.

## 6. Comparison of interaction energy (in kcal/mol) of gas molecule with ligand moiety among several computational methods

**Table S2.** Interaction energies (in kcal/mol) between gas molecule (CO<sub>2</sub>, acetone, and methanol) and ligand moieties.<sup>a</sup>

|                            | MP2   | SCS-MP2 | MP3   | MP2.5 |
|----------------------------|-------|---------|-------|-------|
| CO <sub>2</sub> Adsorption |       |         |       |       |
| Ia                         | -1.02 | -0.74   | -0.59 | -0.80 |
| Ib                         | -1.82 | -1.09   | -0.73 | -1.28 |
| Ic                         | -2.78 | -2.05   | -1.86 | -2.32 |
| IIa                        | -1.19 | -0.79   | -0.77 | -0.98 |
| IIb                        | -0.88 | -0.60   | -0.55 | -0.72 |
| IIc                        | -0.88 | -0.50   | -0.46 | -0.67 |
| IIIa                       | -1.00 | -0.70   | -0.74 | -0.87 |
| IIIb                       | -0.68 | -0.37   | -0.34 | -0.51 |
| IIIc                       | -1.23 | -0.88   | -0.94 | -1.08 |
| Acetone Adsorption         |       |         |       |       |
| Ia                         | -2.90 | -1.81   | -1.60 | -2.25 |
| Ib                         | -5.00 | -3.58   | -3.35 | -4.17 |
| Ic                         | -3.21 | -2.24   | -2.10 | -2.66 |
| IIa                        | -4.02 | -2.69   | -2.30 | -3.16 |
| IIb                        | -1.15 | -0.88   | -0.90 | -1.03 |
| IIc                        | -3.51 | -2.52   | -2.47 | -2.99 |
| IIIa                       | -1.83 | -1.18   | -1.31 | -1.57 |
| IIIb                       | -2.16 | -1.24   | -1.24 | -1.70 |
| IIIc                       | -4.49 | -3.47   | -3.61 | -4.05 |
| Methanol Adsorption        |       |         |       |       |
| Ia                         | -1.48 | -0.77   | -0.68 | -1.08 |
| Ib                         | -2.09 | -1.11   | -1.12 | -1.60 |
| Ic                         | -3.10 | -2.42   | -2.61 | -2.86 |
| IIa                        | -3.41 | -2.57   | -2.91 | -3.16 |
| IIb                        | -3.28 | -2.14   | -2.33 | -2.81 |
| IIc                        | -0.53 | -0.40   | -0.44 | -0.48 |
| IIIa                       | -1.93 | -1.40   | -1.45 | -1.69 |
| IIIb                       | -2.14 | -1.57   | -1.62 | -1.88 |
| IIIc                       | -2.12 | -1.54   | -1.58 | -1.8  |

<sup>a</sup> Ia, Ib, etc. are small cluster models presented in Figure 2.



## 7. Computational results of NMR shielding constants and skews.

**Table S3.** Hydrogen, carbon, and oxygen NMR shielding constants at each atom.

| atom |    | UiO66+15CO <sub>2</sub> |          | UiO-66 + CO <sub>2</sub> |          | UiO66    |
|------|----|-------------------------|----------|--------------------------|----------|----------|
|      |    |                         | site I   | site II                  | site III |          |
| H    | 1  | -16.9459                | -18.8761 | -18.8903                 | -18.9278 | -19.0308 |
| H    | 2  | -16.946                 | -18.9297 | -18.8404                 | -18.9539 | -19.0308 |
| H    | 3  | -16.9459                | -18.8453 | -18.858                  | -19.0252 | -19.0308 |
| H    | 4  | -17.0815                | -18.8583 | -18.8815                 | -18.912  | -19.0308 |
| H    | 5  | -17.0815                | -18.8619 | -18.9437                 | -18.9045 | -19.0308 |
| H    | 6  | -17.0815                | -18.8609 | -18.8599                 | -18.9162 | -19.0308 |
| H    | 7  | -17.1234                | -18.8427 | -18.8706                 | -18.9104 | -19.0307 |
| H    | 8  | -17.1234                | -18.8476 | -18.9484                 | -18.8883 | -19.0307 |
| H    | 9  | -17.1234                | -18.8616 | -18.8484                 | -18.9355 | -19.0307 |
| H    | 10 | -16.7647                | -18.8663 | -18.8609                 | -18.8857 | -19.0308 |
| H    | 11 | -16.7646                | -18.9273 | -18.8295                 | -18.9254 | -19.0307 |
| H    | 12 | -16.7646                | -18.8491 | -18.7075                 | -18.9758 | -19.0308 |
| H    | 13 | -16.8522                | -18.9154 | -18.8131                 | -18.9004 | -19.0307 |
| H    | 14 | -16.8521                | -18.8431 | -18.8313                 | -18.9614 | -19.0308 |
| H    | 15 | -16.8522                | -18.8425 | -18.8527                 | -18.8967 | -19.0307 |
| H    | 16 | -17.1244                | -18.8616 | -18.9536                 | -18.9074 | -19.0308 |
| H    | 17 | -17.1245                | -18.8786 | -18.8887                 | -18.9543 | -19.0308 |
| H    | 18 | -17.1244                | -18.8373 | -18.8744                 | -18.9322 | -19.0308 |
| H    | 19 | -17.0707                | -18.8759 | -18.9658                 | -18.8925 | -19.0308 |
| H    | 20 | -17.0707                | -18.8755 | -18.8851                 | -18.9299 | -19.0308 |
| H    | 21 | -17.0707                | -18.8607 | -18.8602                 | -18.9428 | -19.0308 |
| H    | 22 | -16.9669                | -18.9157 | -18.8288                 | -18.9191 | -19.0308 |
| H    | 23 | -16.9669                | -18.8748 | -18.8369                 | -19.0062 | -19.0307 |
| H    | 24 | -16.9669                | -18.8588 | -18.7178                 | -18.9258 | -19.0307 |
| H    | 25 | -24.1366                | -25.994  | -25.9781                 | -26.0488 | -26.1834 |
| H    | 26 | -24.1365                | -24.7531 | -25.969                  | -26.0325 | -26.1839 |
| H    | 27 | -24.1366                | -25.9947 | -25.9741                 | -26.0249 | -26.1839 |
| H    | 28 | -24.0899                | -25.9925 | -25.9868                 | -26.0345 | -26.1833 |
| C    | 1  | 166.0027                | 165.9329 | 165.5089                 | 164.6864 | 164.5496 |
| C    | 2  | 166.0022                | 165.8018 | 165.8641                 | 164.6538 | 164.5497 |
| C    | 3  | 166.002                 | 166.1919 | 166.2359                 | 164.8347 | 164.5492 |

|   |    |          |          |          |          |          |
|---|----|----------|----------|----------|----------|----------|
| C | 4  | 167.6376 | 166.3393 | 165.872  | 164.5406 | 164.5497 |
| C | 5  | 167.6378 | 165.8853 | 166.7109 | 164.6485 | 164.5491 |
| C | 6  | 167.637  | 165.8335 | 165.7848 | 164.44   | 164.5492 |
| C | 7  | 169.1585 | 165.9389 | 165.9968 | 164.5894 | 164.5503 |
| C | 8  | 169.1584 | 165.7783 | 165.5752 | 165.236  | 164.5501 |
| C | 9  | 169.1591 | 165.8225 | 166.0614 | 164.534  | 164.5498 |
| C | 10 | 166.4998 | 165.9033 | 166.0749 | 164.6707 | 164.5496 |
| C | 11 | 166.5006 | 165.9832 | 165.9006 | 164.5912 | 164.5495 |
| C | 12 | 166.5003 | 165.9445 | 165.2003 | 164.4406 | 164.5501 |
| C | 13 | 167.0291 | 165.9294 | 165.8711 | 164.5374 | 164.5495 |
| C | 14 | 167.0294 | 165.8881 | 165.6022 | 164.4111 | 164.5501 |
| C | 15 | 167.0288 | 165.8235 | 166.1947 | 165.2196 | 164.5498 |
| C | 16 | 168.3677 | 165.7978 | 166.7716 | 164.7091 | 164.5496 |
| C | 17 | 168.3666 | 165.9118 | 165.886  | 164.606  | 164.5497 |
| C | 18 | 168.3668 | 166.0099 | 165.7996 | 164.5964 | 164.5492 |
| C | 19 | 166.3168 | 165.8871 | 165.5788 | 164.4226 | 164.5497 |
| C | 20 | 166.3179 | 165.9213 | 166.0241 | 164.4647 | 164.5496 |
| C | 21 | 166.3176 | 165.9825 | 166.0648 | 164.652  | 164.5492 |
| C | 22 | 167.2221 | 165.8006 | 165.9486 | 164.5817 | 164.5491 |
| C | 23 | 167.2218 | 166.3072 | 166.0868 | 164.7855 | 164.5501 |
| C | 24 | 167.2218 | 165.8558 | 165.2842 | 164.6387 | 164.5503 |
| C | 25 | 207.0273 | 206.3722 | 206.5504 | 205.1243 | 205.0333 |
| C | 26 | 207.0275 | 206.4852 | 206.7229 | 205.033  | 205.0331 |
| C | 27 | 207.0275 | 206.4963 | 206.5649 | 205.2711 | 205.0332 |
| C | 28 | 206.7781 | 206.5299 | 206.5809 | 205.1436 | 205.0333 |
| C | 29 | 206.7783 | 206.5755 | 206.5408 | 205.1898 | 205.0329 |
| C | 30 | 206.7787 | 206.5232 | 206.4048 | 205.3557 | 205.0329 |
| C | 31 | 206.7912 | 206.4822 | 206.5808 | 205.1379 | 205.0330 |
| C | 32 | 206.7915 | 206.5604 | 206.5308 | 205.1995 | 205.0332 |
| C | 33 | 206.7919 | 206.4832 | 206.4309 | 205.3611 | 205.0329 |
| C | 34 | 207.1763 | 206.4084 | 206.573  | 205.1537 | 205.0332 |
| C | 35 | 207.1764 | 206.5611 | 206.7275 | 205.0522 | 205.0329 |
| C | 36 | 207.1763 | 206.4696 | 206.5589 | 205.2329 | 205.0330 |
| C | 37 | 174.9014 | 172.4469 | 172.6455 | 171.4424 | 171.0610 |
| C | 38 | 174.9014 | 172.3619 | 172.4888 | 171.1795 | 171.0610 |
| C | 39 | 174.9013 | 172.15   | 172.4931 | 171.0756 | 171.0610 |
| C | 40 | 172.6362 | 172.7831 | 172.3721 | 171.1332 | 171.0612 |

|   |    |          |          |          |          |          |
|---|----|----------|----------|----------|----------|----------|
| C | 41 | 172.636  | 172.7742 | 172.1193 | 171.154  | 171.0609 |
| C | 42 | 172.6364 | 172.4029 | 172.3709 | 170.8648 | 171.0610 |
| C | 43 | 173.7921 | 172.0878 | 172.3665 | 171.0745 | 171.0612 |
| C | 44 | 173.7919 | 172.2447 | 172.0637 | 171.2737 | 171.0611 |
| C | 45 | 173.7927 | 172.4084 | 172.3485 | 171.6976 | 171.0612 |
| C | 46 | 174.0853 | 172.436  | 172.8128 | 171.0812 | 171.0609 |
| C | 47 | 174.0856 | 172.3907 | 172.4901 | 171.1299 | 171.0611 |
| C | 48 | 174.0858 | 172.8741 | 172.6721 | 171.0627 | 171.0610 |
| C | 49 | 158.3677 | 158.0275 | 161.0757 | 156.6128 |          |
| C | 50 | 158.3685 |          |          |          |          |
| C | 51 | 158.3682 |          |          |          |          |
| C | 52 | 162.5638 |          |          |          |          |
| C | 53 | 162.5639 |          |          |          |          |
| C | 54 | 162.5637 |          |          |          |          |
| C | 55 | 162.6277 |          |          |          |          |
| C | 56 | 162.6272 |          |          |          |          |
| C | 57 | 162.6267 |          |          |          |          |
| C | 58 | 159.1279 |          |          |          |          |
| C | 59 | 159.1287 |          |          |          |          |
| C | 60 | 159.1294 |          |          |          |          |
| C | 61 | 158.9415 |          |          |          |          |
| C | 62 | 158.9411 |          |          |          |          |
| C | 63 | 158.9414 |          |          |          |          |
| O | 1  | 330.0151 | 327.4032 | 327.8758 | 326.4889 | 325.7059 |
| O | 2  | 330.014  | 328.0384 | 327.3926 | 326.3536 | 325.7060 |
| O | 3  | 330.0124 | 325.8849 | 327.2065 | 326.5583 | 325.7055 |
| O | 4  | 330.2722 | 327.5082 | 327.3298 | 325.9145 | 325.7053 |
| O | 5  | 330.2773 | 326.6794 | 327.7815 | 326.8263 | 325.7054 |
| O | 6  | 330.2743 | 327.2787 | 327.076  | 325.5806 | 325.7078 |
| O | 7  | 329.3369 | 327.1927 | 327.5559 | 325.9483 | 325.7044 |
| O | 8  | 329.3378 | 327.4176 | 327.7519 | 326.3006 | 325.7041 |
| O | 9  | 329.3375 | 327.363  | 328.1322 | 325.7596 | 325.7059 |
| O | 10 | 329.0065 | 327.4417 | 327.557  | 325.1181 | 325.7055 |
| O | 11 | 329.0059 | 327.4692 | 327.2887 | 326.303  | 325.7059 |
| O | 12 | 329.0061 | 327.3757 | 327.9765 | 326.1704 | 325.7051 |
| O | 13 | 329.0019 | 327.3583 | 327.3932 | 326.0752 | 325.7059 |
| O | 14 | 329.0073 | 327.1642 | 327.3445 | 326.0191 | 325.7051 |

|   |    |          |          |          |          |          |
|---|----|----------|----------|----------|----------|----------|
| O | 15 | 329.002  | 327.3352 | 327.491  | 326.4042 | 325.7059 |
| O | 16 | 330.33   | 327.383  | 327.8829 | 326.0288 | 325.7055 |
| O | 17 | 330.3291 | 327.5191 | 327.4406 | 325.9208 | 325.7053 |
| O | 18 | 330.3323 | 325.3275 | 327.3758 | 326.2577 | 325.7055 |
| O | 19 | 328.5539 | 326.873  | 327.6034 | 324.7851 | 325.7060 |
| O | 20 | 328.5557 | 327.3962 | 327.6656 | 325.7403 | 325.7059 |
| O | 21 | 328.5573 | 327.1504 | 327.8988 | 326.1512 | 325.7078 |
| O | 22 | 330.5802 | 328.0267 | 327.5914 | 326.0688 | 325.7054 |
| O | 23 | 330.5799 | 327.832  | 327.2794 | 326.4734 | 325.7041 |
| O | 24 | 330.5807 | 327.3739 | 328.7638 | 327.2736 | 325.7044 |
| O | 25 | 63.7493  | 68.539   | 67.9152  | 66.7867  | 66.6637  |
| O | 26 | 63.7489  | 64.2276  | 68.2994  | 67.2213  | 66.6665  |
| O | 27 | 63.7489  | 68.1203  | 68.2173  | 66.8249  | 66.6663  |
| O | 28 | 462.7973 | 462.4736 | 462.1935 | 460.419  | 66.6637  |
| O | 29 | 462.7945 | 462.2118 | 462.3387 | 460.4511 | 458.8087 |
| O | 30 | 462.798  | 462.4086 | 462.3794 | 461.1064 | 458.8079 |
| O | 31 | 87.3862  | 84.3407  | 88.7191  | 85.2981  | 458.8052 |
| O | 32 | 87.388   | 92.5063  | 86.5382  | 88.4151  | 458.8087 |
| O | 33 | 87.3876  |          |          |          |          |
| O | 34 | 96.4756  |          |          |          |          |
| O | 35 | 96.4775  |          |          |          |          |
| O | 36 | 96.477   |          |          |          |          |
| O | 37 | 97.1338  |          |          |          |          |
| O | 38 | 97.1332  |          |          |          |          |
| O | 39 | 97.1341  |          |          |          |          |
| O | 40 | 91.5988  |          |          |          |          |
| O | 41 | 91.5983  |          |          |          |          |
| O | 42 | 91.5986  |          |          |          |          |
| O | 43 | 88.1321  |          |          |          |          |
| O | 44 | 88.1308  |          |          |          |          |
| O | 45 | 88.1314  |          |          |          |          |
| O | 46 | 97.7963  |          |          |          |          |
| O | 47 | 97.7955  |          |          |          |          |
| O | 48 | 97.7943  |          |          |          |          |
| O | 49 | 96.6988  |          |          |          |          |
| O | 50 | 96.6985  |          |          |          |          |
| O | 51 | 96.7007  |          |          |          |          |

|    |    |           |           |           |           |           |
|----|----|-----------|-----------|-----------|-----------|-----------|
| O  | 52 | 93.5792   |           |           |           |           |
| O  | 53 | 93.5813   |           |           |           |           |
| O  | 54 | 93.5829   |           |           |           |           |
| O  | 55 | 105.5691  |           |           |           |           |
| O  | 56 | 105.5679  |           |           |           |           |
| O  | 57 | 105.5692  |           |           |           |           |
| O  | 58 | 92.8741   |           |           |           |           |
| O  | 59 | 92.8729   |           |           |           |           |
| O  | 60 | 92.8734   |           |           |           |           |
| O  | 61 | 67.9223   | 68.3149   | 67.8232   | 67.0971   |           |
| O  | 62 | 461.4949  | 462.3966  | 461.9827  | 460.4866  |           |
| Zr | 1  | 1828.04   | 1823.766  | 1824.7781 | 1823.7208 | 1822.8816 |
| Zr | 2  | 1828.0276 | 1822.0395 | 1824.5496 | 1823.1292 | 1822.8855 |
| Zr | 3  | 1828.0603 | 1823.4958 | 1823.822  | 1823.1603 | 1822.8855 |
| Zr | 4  | 1825.8328 | 1822.2325 | 1824.5466 | 1823.8851 | 1822.8816 |
| Zr | 5  | 1825.8271 | 1823.9865 | 1824.5359 | 1823.1862 | 1822.8741 |
| Zr | 6  | 1825.7891 | 1824.6699 | 1823.7439 | 1823.1419 | 1822.8998 |

**Table S4.** Skews of hydrogen, carbon, and oxygen NMR peaks at each atom.

| atom |    | UiO66+15CO <sub>2</sub> | UiO66+1CO <sub>2</sub> | UiO66+1CO <sub>2</sub> | UiO66+1CO <sub>2</sub> | UiO66  |
|------|----|-------------------------|------------------------|------------------------|------------------------|--------|
|      |    |                         | site I                 | site II                | site III               |        |
| H    | 1  | 0.1167                  | 0.5267                 | 0.5996                 | 0.5176                 | 0.5271 |
| H    | 2  | 0.1167                  | 0.4884                 | 0.435                  | 0.5363                 | 0.5271 |
| H    | 3  | 0.1167                  | 0.5779                 | 0.4532                 | 0.5945                 | 0.5271 |
| H    | 4  | 0.5724                  | 0.5827                 | 0.4328                 | 0.5713                 | 0.5271 |
| H    | 5  | 0.5724                  | 0.5843                 | 0.4484                 | 0.5477                 | 0.5271 |
| H    | 6  | 0.5723                  | 0.5231                 | 0.5199                 | 0.5465                 | 0.5271 |
| H    | 7  | 0.6206                  | 0.505                  | 0.5154                 | 0.5418                 | 0.5271 |
| H    | 8  | 0.6205                  | 0.5301                 | 0.4573                 | 0.6214                 | 0.5271 |
| H    | 9  | 0.6206                  | 0.5553                 | 0.3437                 | 0.6187                 | 0.5271 |
| H    | 10 | 0.1047                  | 0.5353                 | 0.448                  | 0.6001                 | 0.5271 |
| H    | 11 | 0.1048                  | 0.591                  | 0.5208                 | 0.546                  | 0.5271 |
| H    | 12 | 0.1048                  | 0.5153                 | 0.1023                 | 0.5009                 | 0.5271 |
| H    | 13 | 0.4152                  | 0.5997                 | 0.471                  | 0.576                  | 0.5271 |

|   |    |        |        |        |        |        |
|---|----|--------|--------|--------|--------|--------|
| H | 14 | 0.4152 | 0.5286 | 0.5693 | 0.5118 | 0.5271 |
| H | 15 | 0.4152 | 0.5357 | 0.4576 | 0.5871 | 0.5271 |
| H | 16 | 0.7125 | 0.5241 | 0.4195 | 0.5193 | 0.5271 |
| H | 17 | 0.7124 | 0.5267 | 0.4285 | 0.6007 | 0.5271 |
| H | 18 | 0.7124 | 0.6529 | 0.5101 | 0.5449 | 0.5271 |
| H | 19 | 0.5523 | 0.5686 | 0.4499 | 0.6703 | 0.5271 |
| H | 20 | 0.5523 | 0.5318 | 0.5055 | 0.5381 | 0.5271 |
| H | 21 | 0.5523 | 0.5001 | 0.3439 | 0.5365 | 0.5271 |
| H | 22 | 0.5104 | 0.4969 | 0.509  | 0.5418 | 0.5271 |
| H | 23 | 0.5104 | 0.5441 | 0.4609 | 0.6015 | 0.5271 |
| H | 24 | 0.5104 | 0.5524 | 0.1787 | 0.5644 | 0.5271 |
| H | 25 | 0.8937 | 0.9603 | 0.9453 | 0.91   | 1      |
| H | 26 | 0.8937 | 0.9868 | 0.929  | 0.8915 | 1      |
| H | 27 | 0.8937 | 0.9571 | 0.9331 | 0.9601 | 1      |
| H | 28 | 1      | 0.9513 | 0.902  | 0.8807 | 1      |
| C | 1  | 0.3384 | 0.2922 | 0.2834 | 0.2989 | 0.2902 |
| C | 2  | 0.3384 | 0.292  | 0.291  | 0.2937 | 0.2902 |
| C | 3  | 0.3384 | 0.2992 | 0.2966 | 0.2983 | 0.2902 |
| C | 4  | 0.3366 | 0.3015 | 0.2911 | 0.2905 | 0.2902 |
| C | 5  | 0.3366 | 0.2895 | 0.3076 | 0.2978 | 0.2902 |
| C | 6  | 0.3366 | 0.2909 | 0.2879 | 0.2888 | 0.2902 |
| C | 7  | 0.3747 | 0.2949 | 0.2905 | 0.2909 | 0.2902 |
| C | 8  | 0.3747 | 0.2883 | 0.2908 | 0.3022 | 0.2902 |
| C | 9  | 0.3747 | 0.2902 | 0.297  | 0.2908 | 0.2902 |
| C | 10 | 0.3231 | 0.2909 | 0.2924 | 0.2972 | 0.2902 |
| C | 11 | 0.3231 | 0.2937 | 0.2896 | 0.2913 | 0.2902 |
| C | 12 | 0.3231 | 0.296  | 0.2924 | 0.2892 | 0.2902 |
| C | 13 | 0.3212 | 0.2923 | 0.2887 | 0.2891 | 0.2902 |
| C | 14 | 0.3212 | 0.2942 | 0.2826 | 0.2877 | 0.2902 |
| C | 15 | 0.3212 | 0.2896 | 0.2938 | 0.3011 | 0.2902 |
| C | 16 | 0.345  | 0.2894 | 0.31   | 0.298  | 0.2902 |
| C | 17 | 0.345  | 0.292  | 0.2915 | 0.2926 | 0.2902 |
| C | 18 | 0.345  | 0.2984 | 0.2892 | 0.2924 | 0.2902 |
| C | 19 | 0.3577 | 0.2909 | 0.2923 | 0.2988 | 0.2902 |
| C | 20 | 0.3577 | 0.2918 | 0.2917 | 0.2903 | 0.2902 |
| C | 21 | 0.3577 | 0.2979 | 0.2977 | 0.2932 | 0.2902 |
| C | 22 | 0.3284 | 0.2906 | 0.2904 | 0.2915 | 0.2902 |

|   |    |         |         |         |        |        |
|---|----|---------|---------|---------|--------|--------|
| C | 23 | 0.3284  | 0.3018  | 0.2927  | 0.2961 | 0.2902 |
| C | 24 | 0.3284  | 0.2905  | 0.2967  | 0.2995 | 0.2902 |
| C | 25 | 0.0133  | -0.0039 | 0.0032  | 0.0073 | 0.0132 |
| C | 26 | 0.0133  | 0.0207  | 0.0251  | 0.0066 | 0.0132 |
| C | 27 | 0.0133  | 0.0062  | 0.0103  | 0.0162 | 0.0132 |
| C | 28 | -0.0164 | 0.0053  | 0.0048  | 0.0085 | 0.0132 |
| C | 29 | -0.0165 | 0.0138  | 0.0019  | 0.0102 | 0.0132 |
| C | 30 | -0.0164 | 0.015   | -0.0052 | 0.0248 | 0.0132 |
| C | 31 | -0.0231 | 0.0068  | -0.0007 | 0.0151 | 0.0132 |
| C | 32 | -0.0231 | 0.0134  | 0.0081  | 0.0098 | 0.0132 |
| C | 33 | -0.0231 | 0.0029  | -0.011  | 0.025  | 0.0132 |
| C | 34 | 0.0308  | 0.0085  | 0.0103  | 0.0074 | 0.0132 |
| C | 35 | 0.0308  | 0.0139  | 0.0261  | 0.0002 | 0.0132 |
| C | 36 | 0.0308  | 0.0062  | 0.004   | 0.0294 | 0.0132 |
| C | 37 | 0.3009  | 0.2785  | 0.2808  | 0.2861 | 0.2801 |
| C | 38 | 0.3009  | 0.2791  | 0.2771  | 0.2799 | 0.2801 |
| C | 39 | 0.3009  | 0.2903  | 0.2767  | 0.281  | 0.2801 |
| C | 40 | 0.293   | 0.2828  | 0.2747  | 0.2787 | 0.2801 |
| C | 41 | 0.293   | 0.2853  | 0.2753  | 0.288  | 0.2801 |
| C | 42 | 0.293   | 0.2781  | 0.2772  | 0.2812 | 0.2801 |
| C | 43 | 0.298   | 0.2866  | 0.277   | 0.2778 | 0.2801 |
| C | 44 | 0.298   | 0.2807  | 0.2752  | 0.2828 | 0.2801 |
| C | 45 | 0.298   | 0.2784  | 0.2747  | 0.2894 | 0.2801 |
| C | 46 | 0.2935  | 0.2793  | 0.2771  | 0.292  | 0.2801 |
| C | 47 | 0.2935  | 0.2789  | 0.2789  | 0.2795 | 0.2801 |
| C | 48 | 0.2935  | 0.2859  | 0.2722  | 0.2807 | 0.2801 |
| C | 49 | 0.99    | 0.9799  | 0.9851  | 0.9792 |        |
| C | 50 | 0.99    |         |         |        |        |
| C | 51 | 0.99    |         |         |        |        |
| C | 52 | 0.9897  |         |         |        |        |
| C | 53 | 0.9897  |         |         |        |        |
| C | 54 | 0.9897  |         |         |        |        |
| C | 55 | 0.98    |         |         |        |        |
| C | 56 | 0.98    |         |         |        |        |
| C | 57 | 0.98    |         |         |        |        |
| C | 58 | 0.972   |         |         |        |        |
| C | 59 | 0.972   |         |         |        |        |

|   |    |        |        |        |        |        |
|---|----|--------|--------|--------|--------|--------|
| C | 60 | 0.972  |        |        |        |        |
| C | 61 | 0.9853 |        |        |        |        |
| C | 62 | 0.9853 |        |        |        |        |
| C | 63 | 0.9853 |        |        |        |        |
| O | 1  | 0.5011 | 0.4663 | 0.472  | 0.4681 | 0.4621 |
| O | 2  | 0.5011 | 0.4698 | 0.4687 | 0.4688 | 0.4621 |
| O | 3  | 0.5011 | 0.473  | 0.4673 | 0.4646 | 0.4621 |
| O | 4  | 0.5084 | 0.4676 | 0.4641 | 0.4599 | 0.4621 |
| O | 5  | 0.5084 | 0.4634 | 0.4558 | 0.4726 | 0.4621 |
| O | 6  | 0.5084 | 0.4632 | 0.462  | 0.4625 | 0.4621 |
| O | 7  | 0.4967 | 0.4808 | 0.4625 | 0.4609 | 0.4621 |
| O | 8  | 0.4967 | 0.4589 | 0.4551 | 0.4646 | 0.4621 |
| O | 9  | 0.4967 | 0.4607 | 0.4613 | 0.4621 | 0.4621 |
| O | 10 | 0.4646 | 0.4662 | 0.4593 | 0.4524 | 0.4621 |
| O | 11 | 0.4646 | 0.4522 | 0.4614 | 0.4624 | 0.4621 |
| O | 12 | 0.4646 | 0.4606 | 0.4686 | 0.4559 | 0.4621 |
| O | 13 | 0.4794 | 0.4509 | 0.4609 | 0.4556 | 0.4621 |
| O | 14 | 0.4794 | 0.4774 | 0.4674 | 0.4555 | 0.4621 |
| O | 15 | 0.4794 | 0.4615 | 0.4554 | 0.4584 | 0.4621 |
| O | 16 | 0.4996 | 0.4589 | 0.4575 | 0.4673 | 0.4621 |
| O | 17 | 0.4996 | 0.4661 | 0.465  | 0.4628 | 0.4621 |
| O | 18 | 0.4996 | 0.4733 | 0.464  | 0.4648 | 0.4621 |
| O | 19 | 0.5044 | 0.4623 | 0.4603 | 0.4612 | 0.4621 |
| O | 20 | 0.5043 | 0.4637 | 0.4653 | 0.4622 | 0.4621 |
| O | 21 | 0.5044 | 0.4667 | 0.4654 | 0.4677 | 0.4621 |
| O | 22 | 0.4824 | 0.4692 | 0.4649 | 0.4625 | 0.4621 |
| O | 23 | 0.4824 | 0.4695 | 0.4685 | 0.4642 | 0.4621 |
| O | 24 | 0.4824 | 0.4612 | 0.4697 | 0.4732 | 0.4621 |
| O | 25 | 0.928  | 0.992  | 0.9923 | 0.9968 | 1      |
| O | 26 | 0.928  | 0.9396 | 0.9851 | 0.9843 | 1      |
| O | 27 | 0.928  | 0.9988 | 0.9838 | 0.9822 | 1      |
| O | 28 | 0.9734 | 0.9492 | 0.972  | 0.9863 | 1      |
| O | 29 | 0.9733 | 0.9989 | 0.9778 | 0.9614 | 0.9999 |
| O | 30 | 0.9734 | 0.9506 | 0.9844 | 0.9647 | 0.9999 |
| O | 31 | 0.9499 | 0.9594 | 0.9616 | 0.9328 | 0.9999 |
| O | 32 | 0.9499 | 0.9499 | 0.988  | 0.957  | 0.9999 |
| O | 33 | 0.9499 |        |        |        |        |



|    |    |         |         |         |         |         |
|----|----|---------|---------|---------|---------|---------|
| O  | 34 | 0.9532  |         |         |         |         |
| O  | 35 | 0.9532  |         |         |         |         |
| O  | 36 | 0.9532  |         |         |         |         |
| O  | 37 | 0.9858  |         |         |         |         |
| O  | 38 | 0.9858  |         |         |         |         |
| O  | 39 | 0.9858  |         |         |         |         |
| O  | 40 | 0.9916  |         |         |         |         |
| O  | 41 | 0.9916  |         |         |         |         |
| O  | 42 | 0.9916  |         |         |         |         |
| O  | 43 | 0.9435  |         |         |         |         |
| O  | 44 | 0.9435  |         |         |         |         |
| O  | 45 | 0.9435  |         |         |         |         |
| O  | 46 | 0.971   |         |         |         |         |
| O  | 47 | 0.971   |         |         |         |         |
| O  | 48 | 0.971   |         |         |         |         |
| O  | 49 | 0.9615  |         |         |         |         |
| O  | 50 | 0.9615  |         |         |         |         |
| O  | 51 | 0.9616  |         |         |         |         |
| O  | 52 | 0.9399  |         |         |         |         |
| O  | 53 | 0.9399  |         |         |         |         |
| O  | 54 | 0.9399  |         |         |         |         |
| O  | 55 | 0.9435  |         |         |         |         |
| O  | 56 | 0.9435  |         |         |         |         |
| O  | 57 | 0.9435  |         |         |         |         |
| O  | 58 | 0.9149  |         |         |         |         |
| O  | 59 | 0.9149  |         |         |         |         |
| O  | 60 | 0.9149  |         |         |         |         |
| O  | 61 | 0.9999  | 0.9855  | 0.9914  | 0.9829  |         |
| O  | 62 | 0.9999  | 0.9425  | 0.996   | 0.9641  |         |
| Zr | 1  | -0.7916 | -0.8231 | -0.8239 | -0.8233 | -0.8287 |
| Zr | 2  | -0.7915 | -0.8214 | -0.8237 | -0.8176 | -0.8287 |
| Zr | 3  | -0.7913 | -0.8212 | -0.818  | -0.8201 | -0.8287 |
| Zr | 4  | -0.7965 | -0.8218 | -0.8235 | -0.8197 | -0.8287 |
| Zr | 5  | -0.7966 | -0.8234 | -0.8211 | -0.8178 | -0.8287 |
| Zr | 6  | -0.7968 | -0.8224 | -0.8242 | -0.8178 | -0.8287 |

---



## 8. Reference

- (S1) Chevreau, H.; Liang, W.; Kearley, G. J.; Duyker, S. G.; D'Alessandro, D. M.; Peterson, V. K. Concentration-dependent binding of CO<sub>2</sub> and CD<sub>4</sub> in UiO-66 (Zr). *J. Phys. Chem. C* **2015**, *119*, 6980–6987.
